# Supplementary material for: Sex Hormone Candidate Gene Polymorphisms Are Associated with Endometriosis
Source: MDPI journal article supplement (doi:10.3390/ijms232213691), 2022-11-08
Supplement: s1 [file s1]

Supplementary Table S1

The allele and genotype frequencies of the studied SNPs in the endometriosis and control groups

| Chr                            | SNP         | Gene            | Minor allele | Major allele | Minor allele frequency | Number of the studied chromosomes | Genotype distribution* | H <sub>o</sub> | H <sub>e</sub> | P <sub>HWE</sub> |
|--------------------------------|-------------|-----------------|--------------|--------------|------------------------|-----------------------------------|------------------------|----------------|----------------|------------------|
| Endometriosis patients (n=395) |             |                 |              |              |                        |                                   |                        |                |                |                  |
| 7                              | rs148982377 | <i>ZNF789</i>   | C            | T            | 0.057                  | 770                               | 1/42/342               | 0.109          | 0.108          | 1.000            |
| 7                              | rs34670419  | <i>ZKSCAN5</i>  | T            | G            | 0.044                  | 768                               | 1/32/351               | 0.083          | 0.085          | 0.534            |
| 11                             | rs11031002  | <i>FSHB</i>     | A            | T            | 0.096                  | 756                               | 4/65/309               | 0.172          | 0.174          | 0.766            |
| 11                             | rs11031005  | <i>FSHB</i>     | C            | T            | 0.094                  | 766                               | 2/68/313               | 0.177          | 0.170          | 0.557            |
| 11                             | rs112295236 | <i>SLC22A10</i> | G            | C            | 0.064                  | 768                               | 2/45/337               | 0.117          | 0.119          | 0.659            |
| 12                             | rs117585797 | <i>ANO2</i>     | A            | C            | 0.022                  | 758                               | 0/17/362               | 0.045          | 0.044          | 1.000            |
| 16                             | rs117145500 | <i>CHD9</i>     | C            | A            | 0.113                  | 760                               | 5/76/299               | 0.200          | 0.201          | 1.000            |
| 17                             | rs727428    | <i>SHBG</i>     | T            | C            | 0.372                  | 760                               | 54/175/151             | 0.460          | 0.467          | 0.826            |
| 17                             | rs1641549   | <i>TP53</i>     | T            | C            | 0.220                  | 764                               | 26/116/240             | 0.304          | 0.343          | 0.026            |
| Control group (n=981)          |             |                 |              |              |                        |                                   |                        |                |                |                  |
| 7                              | rs148982377 | <i>ZNF789</i>   | C            | T            | 0.048                  | 1888                              | 1/88/855               | 0.093          | 0.091          | 0.718            |
| 7                              | rs34670419  | <i>ZKSCAN5</i>  | T            | G            | 0.039                  | 1890                              | 2/70/873               | 0.074          | 0.075          | 0.650            |
| 11                             | rs11031002  | <i>FSHB</i>     | A            | T            | 0.135                  | 1862                              | 17/218/696             | 0.234          | 0.234          | 1.000            |
| 11                             | rs11031005  | <i>FSHB</i>     | C            | T            | 0.136                  | 1894                              | 20/217/710             | 0.229          | 0.235          | 0.488            |
| 11                             | rs112295236 | <i>SLC22A10</i> | G            | C            | 0.050                  | 1874                              | 2/90/845               | 0.096          | 0.095          | 1.000            |
| 12                             | rs117585797 | <i>ANO2</i>     | A            | C            | 0.026                  | 1866                              | 1/46/886               | 0.049          | 0.050          | 0.462            |
| 16                             | rs117145500 | <i>CHD9</i>     | C            | A            | 0.097                  | 1862                              | 7/167/757              | 0.179          | 0.175          | 0.707            |
| 17                             | rs727428    | <i>SHBG</i>     | T            | C            | 0.385                  | 1882                              | 132/460/349            | 0.489          | 0.473          | 0.335            |
| 17                             | rs1641549   | <i>TP53</i>     | T            | C            | 0.241                  | 1860                              | 61/326/543             | 0.350          | 0.366          | 0.209            |

Note: \* minor allele homozygotes / heterozygotes / major allele homozygotes
