# Supplementary material for: Sex Hormone Candidate Gene Polymorphisms Are Associated with Endometriosis
Source: MDPI journal article supplement (doi:10.3390/ijms232213691), 2022-11-08
Supplement: s1 [file s1]

Supplementary Table S2

Genotype combinations associated with endometriosis \*

| N                              | Genotype combinations                                           | <i>beta</i> | P        | Risk,<br>High/Low |
|--------------------------------|-----------------------------------------------------------------|-------------|----------|-------------------|
| Two-order interaction models   |                                                                 |             |          |                   |
| 1                              | rs11031002 TT x rs11031005 TT                                   | 0.74        | 0.000002 | H                 |
|                                | rs11031002 TA x rs11031005 TT                                   | -2.36       | 0.000002 | L                 |
|                                | rs11031002 TT x rs11031005 TC                                   | -1.42       | 0.001    | L                 |
| 2                              | rs11031002 TA x rs112295236 CC                                  | -0.63       | 0.0003   | L                 |
|                                | rs11031002 TT x rs112295236 CC                                  | 0.29        | 0.039    | H                 |
| 3                              | rs117145500 AA x rs11031002 TT                                  | 0.28        | 0.037    | H                 |
|                                | rs117145500 AA x rs11031002 TA                                  | -0.66       | 0.0006   | L                 |
| 4                              | rs11031002 TA x rs34670419 GG                                   | -0.59       | 0.0006   | L                 |
|                                | rs11031002 TT x rs34670419 GG                                   | 0.39        | 0.008    | H                 |
| 5                              | rs11031002 TA x rs727428 CT                                     | -0.85       | 0.0005   | L                 |
| Three-order interaction models |                                                                 |             |          |                   |
| 1                              | rs11031002 TT x rs117585797 CC x rs11031005 TT                  | 0.67        | 0.000006 | H                 |
|                                | rs11031002 TA x rs117585797 CC x rs11031005 TT                  | -2.61       | 0.000002 | L                 |
|                                | rs11031002 TT x rs117585797 CC x rs11031005 TC                  | -1.91       | 0.0008   | L                 |
| 2                              | rs11031002 TA x rs112295236 CC x rs11031005 TT                  | -3.35       | 0.000006 | L                 |
|                                | rs11031002 TT x rs112295236 CC x rs11031005 TT                  | 0.49        | 0.0004   | H                 |
|                                | rs11031002 TT x rs112295236 CC x rs11031005 TC                  | -1.61       | 0.002    | L                 |
| 3                              | rs11031002 TT x rs1641549 CC x rs11031005 TT                    | 0.41        | 0.001    | H                 |
|                                | rs11031002 TA x rs1641549 CC x rs11031005 TT                    | -3.06       | 0.003    | L                 |
|                                | rs11031002 TA x rs1641549 CT x rs11031005 TT                    | -1.97       | 0.003    | L                 |
|                                | rs11031002 TT x rs1641549 CC x rs11031005 TA                    | -1.31       | 0.032    | L                 |
| 4                              | rs11031002 TA x rs11031005 TT x rs34670419 GG                   | -2.24       | 0.000008 | L                 |
|                                | rs11031002 TT x rs11031005 TT x rs34670419 GG                   | 0.58        | 0.00005  | H                 |
|                                | rs11031002 TT x rs11031005 TC x rs34670419 GG                   | -1.56       | 0.003    | L                 |
| 5                              | rs117145500 AA x rs11031002 TT x rs11031005 TT                  | 0.41        | 0.002    | H                 |
|                                | rs117145500 AA x rs11031002 TA x rs11031005 TT                  | -2.33       | 0.00003  | L                 |
|                                | rs117145500 AA x rs11031002 TT x rs11031005 TC                  | -1.31       | 0.016    | L                 |
|                                | rs117145500 AC x rs11031002 TA x rs11031005 TT                  | -2.39       | 0.034    | L                 |
| Four-order interaction models  |                                                                 |             |          |                   |
| 1                              | rs11031002 TA x rs117585797 CC x rs112295236 CC x rs11031005 TT | -3.35       | 0.000006 | L                 |
|                                | rs11031002 TT x rs117585797 CC x rs112295236 CC x rs11031005 TT | 0.46        | 0.0006   | H                 |
| 2                              | rs11031002 TA x rs117585797 CC x rs11031005 TT x rs34670419 GG  | -2.49       | 0.000006 | L                 |
|                                | rs11031002 TT x rs117585797 CC x rs11031005 TT x rs34670419 GG  | 0.56        | 0.00005  | H                 |
|                                | rs11031002 TT x rs117585797 CC x rs11031005 TC x rs34670419 GG  | -2.18       | 0.0007   | L                 |

\* Genotype combinations are derived from the interaction models obtained by the MB-MDR method and described in tables 3
