# Supplementary material for: Sex Hormone Candidate Gene Polymorphisms Are Associated with Endometriosis
Source: MDPI journal article supplement (doi:10.3390/ijms232213691), 2022-11-08
Supplement: s1 [file s1]

Supplementary Table S9

The GWAS data about associations of the studied candidate genes polymorphisms with the level of sex hormones in women or prevalence of women

| SNP         | Position<br>(chr: hg38) | Phenotype                                                | Association (significance)<br>(affected allele)     | Reference                |
|-------------|-------------------------|----------------------------------------------------------|-----------------------------------------------------|--------------------------|
| rs148982377 | 7: 99477415             | DHEAS                                                    | $\beta = -0.255$ ( $p = 1.82 \times 10^{-14}$ ) (C) | Ruth K.S. et al., 2016a  |
| rs34670419  | 7: 99533211             | Progesterone                                             | $\beta = -0.346$ ( $p = 6.09 \times 10^{-14}$ ) (T) | Ruth K.S. et al., 2016a  |
|             |                         | DHEAS                                                    | $\beta = -0.780$ ( $p = 2.07 \times 10^{-9}$ ) (T)  | Wood A.R. et al., 2013   |
|             |                         | Cortisol/<br>DHEAS ratio                                 | $\beta = 0.721$ ( $p = 2.35 \times 10^{-8}$ ) (T)   | Wood A.R. et al., 2013   |
| rs11031002  | 11: 30193714            | LH                                                       | $\beta = 0.221$ ( $p = 3.94 \times 10^{-9}$ ) (A)   | Ruth K.S. et al., 2016a  |
| rs11031005  | 11: 30204809            | FSH                                                      | $\beta = -0.232$ ( $p = 1.74 \times 10^{-8}$ ) (C)  | Ruth K.S. et al., 2016a  |
|             |                         | Total testosterone                                       | $\beta = 0.033$ ( $p = 7.2 \times 10^{-17}$ ) (C)   | Ruth K.S. et al., 2020   |
|             |                         | Bioavailable testosterone                                | $\beta = 0.023$ ( $p = 1.5 \times 10^{-10}$ ) (C)   | Ruth K.S. et al., 2020   |
| rs112295236 | 11: 63147874            | Progesterone                                             | $\beta = 0.255$ ( $p = 7.68 \times 10^{-12}$ ) (G)  | Ruth K.S. et al., 2016a  |
|             |                         | Bioavailable testosterone<br>(in men and women combined) | $\beta = 0.031$ ( $p = 2.3 \times 10^{-14}$ ) (G)   | Ruth K.S. et al., 2020   |
| rs117585797 | 12: 5902324             | Oestradiol                                               | $\beta = 0.624$ ( $p = 1.63 \times 10^{-8}$ ) (A)   | Ruth K.S. et al., 2016a  |
| rs117145500 | 16: 52913718            | FAI                                                      | $\beta = -0.276$ ( $p = 1.50 \times 10^{-8}$ ) (C)  | Ruth K.S. et al., 2016a  |
| rs727428    | 17: 7634474             | SHBG                                                     | $\beta = -0.126$ ( $p = 2.09 \times 10^{-16}$ ) (T) | Prescott J. et al., 2012 |
|             |                         | Bioavailable testosterone                                | $\beta = 0.095$ ( $p = 8.3 \times 10^{-309}$ ) (T)  | Ruth K.S. et al., 2020   |
| rs1641549   | 17: 7671457             | SHBG                                                     | $\beta = -0.127$ ( $p = 1.21 \times 10^{-15}$ ) (T) | Ruth K.S. et al., 2016a  |

Abbreviations: Chr, chromosome; DHEAS, dehydroepiandrosterone sulphate; FAI, free androgen index ((testosterone/SHBG)  $\times$  100); FSH, follicle-stimulating hormone; LH, luteinizing hormone; SHBG, sex hormone binding globulin.

## References

1. Ruth KS, Campbell PJ, Chew S, Lim EM, Hadlow N, Stuckey BG, Brown SJ, Feenstra B, Joseph J, Surdulescu GL, Zheng HF, Richards JB, Murray A, Spector TD, Wilson SG, Perry JR. Genome-wide association study with 1000 genomes imputation identifies signals for nine sex hormone-related phenotypes. *Eur J Hum Genet.* 2016 Feb;24(2):284-90. doi: 10.1038/ejhg.2015.102.
2. Prescott J, Thompson DJ, Kraft P, Chanock SJ, Audley T, Brown J, Leyland J, Folkard E, Doody D, Hankinson SE, Hunter DJ, Jacobs KB, Dowsett M, Cox DG, Easton DF, De Vivo I. Genome-wide association study of circulating estradiol, testosterone, and sex hormone-binding globulin in postmenopausal women. *PLoS One.* 2012;7(6):e37815. doi: 10.1371/journal.pone.0037815.
3. Wood AR, Perry JR, Tanaka T, et al. Imputation of variants from the 1000 Genomes Project modestly improves known associations and can identify low-frequency variant-phenotype associations undetected by HapMap based imputation. *PLoS One.* 2013;8(5):e64343. doi:10.1371/journal.pone.0064343
4. Ruth KS, Day FR, Tyrrell J, et al. Using human genetics to understand the disease impacts of testosterone in men and women. *Nat Med.* 2020;26(2):252-258. doi:10.1038/s41591-020-0751-5
